# Supplementary material for: Bayesian molecular design with a chemical language model
Source: PubMed Central journal article supplement (PMC5393296; doi:10.1007/s10822-016-0008-z), 2017-03-09
Supplement: 10822_2016_8_MOESM1_ESM.pdf [file 10822_2016_8_MOESM1_ESM.pdf]

## Supplementary Materials

# Bayesian molecular design with a chemical language model

Hisaki Ikebata<sup>1</sup> Kenta Hongo<sup>2,3,4</sup> Tetsu Isomura<sup>5</sup> Ryo Maezono<sup>2</sup> Ryo Yoshida<sup>1,3,6</sup>

### Appendix 1: Revision of SMILES representation rule

Table 1 in the main body of the article summarizes the correspondence between the formal SMILES and the revised encoding rule. For example, a SMILES string of a molecule,  $T = \text{c12CNC}(\text{Cc1nc}[\text{nH}]2)\text{C}(=\text{O})\text{O}$ , is revised to  $S = \text{c}\&\&\text{CNC}(\text{Cc}\&2\text{nc}[\text{nH}]\&1)\text{C}(=\text{O})\text{O}\$$  as  $s_1 = \text{c}$ ,  $s_2 = \&$ ,  $s_3 = \&$ ,  $s_4 = \text{C}$ ,  $s_5 = \text{N}$ ,  $s_6 = \text{C}$ ,  $s_7 = ($ ,  $s_8 = \text{C}$ ,  $s_9 = \text{c}$ ,  $s_{10} = \&2$ ,  $s_{11} = \text{n}$ ,  $s_{12} = \text{c}$ ,  $s_{13} = [\text{nH}]$ ,  $s_{14} = \&1$ ,  $s_{15} = )$ ,  $s_{16} = \text{C}$ ,  $s_{17} = ($ ,  $s_{18} = =\text{O}$ ,  $s_{19} = )$ ,  $s_{20} = \text{O}$ ,  $s_{21} = \$$ . The molecule contains two rings indicated by the two digits '1' and '2' in  $T$ . These characters are revised to the start and terminal characters '&' and '&<sub>*i*</sub>' ( $i \in \{1, 2\}$ ). The bracket-surrounded characters  $[\text{nH}]$  in  $T$  form the single character  $s_{13} = [\text{nH}]$  in  $S$ . Also, the bond followed by 'O' is concatenated with that the right-hand adjacent atom as  $s_{18} = =\text{O}$ . Finally, the character '\$' appears at the end of  $S$  to indicate that the structure is fully defined.

### Appendix 2: Sample code of *iqspr* package

```
#install.packages("iqspr ")#Install package
library(iqspr) #Call package

#Forward prediction
data(qspr.data) #sample data
idx <- sample(nrow(qspr.data), 5000)#Selection of training data

#SMILES of training data for regression
smis <- paste(qspr.data[idx ,1])

#Property (HOMO-LUMO gap, internal energy)
y <- qspr.data[idx , c(2,5)]

#Bayesian linear regression (descriptor: "graph")
qsprpred <- QSPRpred$new(
  smis=smis, y=as.matrix(y), v_fnames="graph")

#Prior distribution with the chemical language model
data(trainedSMI) #Training data
engram <- ENgram$new(trainedSMI, order=6) #6-gram model

#Specification of target regions for the properties
# (min and max of internal energy and HOMO-LUMO gap)
qsprpred$ymin <- c(200, 1.5)
qsprpred$ymax <- c(350, 2.5)
```

---

Ryo Yoshida

10-3 Midori-cho, Tachikawa, Tokyo 190-8562, Japan

<sup>1</sup> The Graduate University for Advanced Studies (SOKENDAI), <sup>2</sup> Japan Advanced Institute of Science and Technology (JAIST),

<sup>3</sup> National Institute for Materials Science (NIMS), <sup>4</sup> PRESTO, Japan Science and Technology Agency (JST), <sup>5</sup> The KAITEKI

Institute, Inc., <sup>6</sup> The Institute of Statistical Mathematics (ISM), Research Organization of Information and Systems

```
#Backward prediction (initial structure = phenol)
smchem <- SmcChem$new(smis=rep("c1ccccc1", 25),
                      v_qsprpred=qsprpred,
                      v_engram=engram, temp=3, decay=0.95)
                      smchem$smcexec(niter=100, preorder=0, nview=4)
gensmi <- get_hiscores(smchem, nsmi=4)
viewstr(gensmi[1:4, 1])
```

## Supplementary Figure 1

Snapshot for the process of refining the HOMO-LUMO gap and internal energy (blue dots) toward a desired region (rectangle) where training data (gray dots) are sparsely populated.

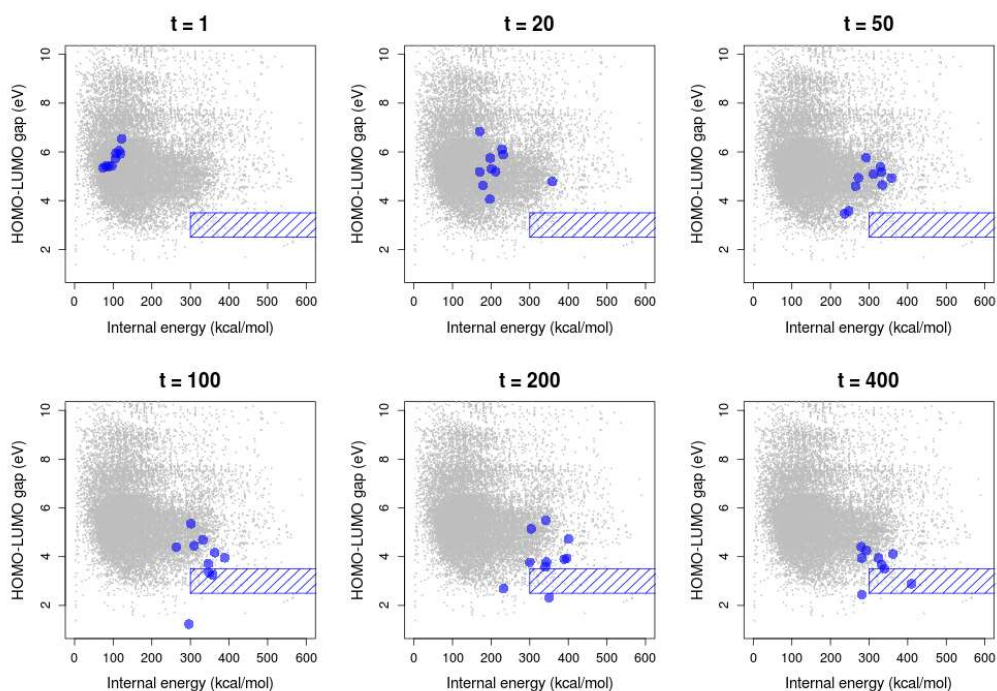

## Supplementary Data 1

Structure-property data set, available at the supporting information website. The HOMO-LUMO gaps and internal energies of 16,674 instances of organic compounds in PubChem were calculated by DFT with GAUSSIAN09.

## Supplementary Movie 1

Movie of the process of transforming structures with the desired property region  $U_1$ , available at the supporting information website.

## Supplementary Movie 2

Movie of the process of transforming structures with the desired property region  $U_2$ , available at the supporting information website.

### Supplementary Movie 3

Movie of the process of transforming structures with the desired property region  $U_3$ , available at the supporting information website.
